# Supplementary material for: Plasma activated water: a study of gas type, electrode material, and power supply selection and the impact on the final frontier
Source: Royal Society of Chemistry journal article supplement (doi:10.1039/d2cp03489a), 2023-01-01
Supplement: d2cp03489a1.pdf [file d2cp03489a1.pdf]

### Electronic Supporting Information

A summary of key reactive oxygen and nitrogen reactions induced by plasma interactions with water.

| Number | Reaction                                                               | Ref   |
|--------|------------------------------------------------------------------------|-------|
| (1)    | $H_2O + e^- \rightarrow \bullet OH + H + e^-$                          | 3, 30 |
| (2)    | $H_2O + e^- \rightarrow H^+ + \bullet OH + 2e^-$                       | 3, 30 |
| (3)    | $H_2O + e^- \rightarrow 2H\bullet + O\bullet + e^-$                    | 3, 30 |
| (4)    | $O_2 + e^- \rightarrow O^+ + O\bullet + 2e^-$                          | 3, 30 |
| (5)    | $O_2 + e^- \rightarrow O^- + O\bullet$                                 | 3, 30 |
| (6)    | $O\bullet + O_2 \rightarrow O_3$                                       | 3, 30 |
| (7)    | $O_3 + NO \rightarrow NO_2 + O_2$                                      | 3, 30 |
| (8)    | $N\bullet + O_2 \rightarrow NO + O\bullet$                             | 3, 30 |
| (9)    | $O\bullet + N_2 \rightarrow NO + N\bullet$                             | 3, 30 |
| (10)   | $O\bullet + NO_2 \rightarrow NO + O_2$                                 | 3, 30 |
| (11)   | $2NO + O_2 \rightarrow 2NO_2$                                          | 3, 30 |
| (12)   | $NO_2 + \bullet OH \rightarrow HNO_3$                                  | 3, 30 |
| (13)   | $H_2O_2 + hv \rightarrow \bullet OH + \bullet OH$                      | 3, 30 |
| (14)   | $3NO_2 + H_2O \rightarrow 2HNO_3 + NO$                                 | 3, 30 |
| (15)   | $H_2O_2 + H^+ + NO_2^- \rightarrow ONOOH + H_2O$                       | 3, 30 |
| (16)   | $OH + OH \rightarrow H_2O_2$                                           | 3, 30 |
| (17)   | $NO + NO \rightarrow N_2 + O_2$                                        | 3, 30 |
| (18)   | $NO + \bullet OH \rightarrow HNO_2$                                    | 3, 30 |
| (19)   | $HNO_2 + \bullet OH \rightarrow NO_2 + H_2O$                           | 3, 30 |
| (20)   | $NO_2 + hv \rightarrow NO + O\bullet$                                  | 3, 30 |
| (21)   | $NO_3 + hv \rightarrow NO + O_2$                                       | 3, 30 |
| (22)   | $NO_2 + NO_3 \rightarrow N_2H_5$                                       | 3, 30 |
| (23)   | $N_2O_5 + H_2O \rightarrow 2HNO_3$                                     | 3, 30 |
| (24)   | $2NO_2 + H_2O \rightarrow NO_2^- + NO_3^- + 2H^+$                      | 3, 30 |
| (25)   | $3NO_2^- + 3H^+ \rightarrow 2NO + NO_3^- + H_3O^+$                     | 3, 30 |
| (26)   | $OH + NO_2 \rightarrow [O = N - OOH] \rightarrow [O = N - OO^- + H^+]$ | 3, 30 |
| (27)   | $O_2 + O_2 + O\bullet \rightarrow O_3 + O_2$                           | 26    |
| (28)   | $N_2 + O_2 \rightarrow 2NO$                                            | 26    |
| (29)   | $N\bullet + O\bullet \rightarrow NO$                                   | 17    |
| (30)   | $NO + O\bullet \rightarrow NO_2$                                       | 17    |
| (31)   | $NO_2 + O_3 \leftrightarrow NO_3 + O_2$                                | 17    |
| (32)   | $NO + NO_3 \leftrightarrow NO_2 + NO_2$                                | 17    |
| (33)   | $NO + NO_2 + H_2O \rightarrow 2NO_2^- + 2H^+$                          | 17    |
| (34)   | $NO_2^- + O_3 \rightarrow NO_3^- + O_2$                                | 17    |
| (35)   | $NO + \bullet O_2^- \leftrightarrow NO_3^-$                            | 17    |
| (36)   | $ONOOH \rightarrow NO_2 + \bullet OH$                                  | 31    |
| (37)   | $ONOOH \rightarrow HNO_3 \rightarrow NO_3^- + H^+$                     | 31    |

- (38)  $NO_3 + HO_2 \rightarrow NO_3^- + O_2 + H^+$  27
- (39)  $\bullet NO_2 + \bullet OH + M \rightarrow ONOOH + M$  27
- (40)  $\bullet NO + HO_2 \bullet \rightarrow ONOOH$  27
- (41)  $\bullet NO + \bullet O_2^- \rightarrow ONOO^-$  27
- (42)  $ONOOH + H_2O_2 \rightarrow O_2NOOH + H_2O$  27
- (43)  $O_2NOOH \rightarrow NO_2 + HO_2 \bullet$  (Only at acidic pH) 27

*Full pH data sets*

| AC Tap pH           |      |                 |      |      |                |
|---------------------|------|-----------------|------|------|----------------|
| Time (min)          | He   | CO <sub>2</sub> | Ar   | Air  | N <sub>2</sub> |
| 0                   | 8.16 | 8.16            | 8.16 | 8.16 | 8.16           |
| 1                   | 9.09 | 5.21            | 9.13 | 9.06 | 9.15           |
| 5                   | 8.78 | 5.08            | 9.09 | 8.32 | 8.98           |
| 10                  | 8.75 | 5.04            | 9.06 | 8.12 | 8.86           |
| 15                  | 8.31 | 4.98            | 8.61 | 7.22 | 8.98           |
|                     |      |                 |      |      |                |
| DC Tap pH           |      |                 |      |      |                |
| Time (min)          | He   | CO <sub>2</sub> | Ar   | Air  | N <sub>2</sub> |
| 0                   | 8.16 | 8.16            | 8.16 | 8.16 | 8.16           |
| 1                   | 9.12 | 5.26            | 8.12 | 7.22 | 7.87           |
| 5                   | 8.70 | 5.30            | 7.22 | 4.34 | 7.29           |
| 10                  | 8.66 | 5.86            | 9.09 | 3.78 | 6.27           |
| 15                  | 8.69 | 6.46            | 8.78 | 3.66 | 4.41           |
|                     |      |                 |      |      |                |
| DC DI pH            |      |                 |      |      |                |
| Time (min)          | He   | CO <sub>2</sub> | Ar   | Air  | N <sub>2</sub> |
| 0                   | 5.26 | 5.26            | 5.26 | 5.26 | 5.26           |
| 1                   | 5.57 | 4.25            | 5.82 | 3.61 | 3.99           |
| 5                   | 5.72 | 5.08            | 5.59 | 3.21 | 3.52           |
| 10                  | 5.34 | 4.75            | 5.29 | 2.99 | 3.31           |
| 15                  | 4.94 | 5.28            | 5.01 | 2.88 | 3.38           |
|                     |      |                 |      |      |                |
| 110 ns Pulsed DI pH |      |                 |      |      |                |
| Time (min)          | He   | CO <sub>2</sub> | Ar   | Air  | N <sub>2</sub> |
| 0                   | 5.26 | 5.26            | 5.26 | 5.26 | 5.26           |
| 1                   | 5.73 | 4.17            | 5.62 | 5.02 | 4.72           |
| 5                   | 4.88 | 3.94            | 4.55 | 4.46 | 4.79           |
| 10                  | 4.37 | 3.94            | 4.30 | 3.98 | 4.48           |
| 15                  | 5.49 | 4.05            | 5.02 | 3.52 | 3.81           |
|                     |      |                 |      |      |                |
| 220 ns Pulsed DI pH |      |                 |      |      |                |

| Time (min)          | He   | CO <sub>2</sub> | Ar   | Air  | N <sub>2</sub> |
|---------------------|------|-----------------|------|------|----------------|
| 0                   | 5.26 | 5.26            | 5.26 | 5.26 | 5.26           |
| 1                   | 5.72 | 4.19            | 5.59 | 4.22 | 4.71           |
| 5                   | 4.67 | 3.96            | 4.39 | 4.42 | 4.74           |
| 10                  | 4.32 | 3.94            | 4.17 | 3.88 | 4.35           |
| 15                  | 5.69 | 4.07            | 5.63 | 3.46 | 3.73           |
| 400 ns Pulsed DI pH |      |                 |      |      |                |
| Time (min)          | He   | CO <sub>2</sub> | Ar   | Air  | N <sub>2</sub> |
| 0                   | 5.26 | 5.26            | 5.26 | 5.26 | 5.26           |
| 1                   | 5.39 | 4.08            | 5.24 | 4.98 | 4.78           |
| 5                   | 4.73 | 3.94            | 4.30 | 4.22 | 4.50           |
| 10                  | 4.35 | 3.98            | 4.25 | 3.98 | 4.24           |
| 15                  | 5.15 | 3.84            | 5.47 | 3.34 | 3.71           |

*Full Platinum Conductivity Data Sets*

| AC DI Conductivity ( $\mu\text{S}\cdot\text{cm}^{-1}$ )  |       |                 |       |      |                |
|----------------------------------------------------------|-------|-----------------|-------|------|----------------|
| Time (min)                                               | He    | CO <sub>2</sub> | Ar    | Air  | N <sub>2</sub> |
| 0                                                        | 0.76  | 0.76            | 0.76  | 0.76 | 0.76           |
| 1                                                        | 1.01  | 32.3            | 0.950 | 3.22 | 1.02           |
| 5                                                        | 0.690 | 44.3            | 1.07  | 16.1 | 0.720          |
| 10                                                       | 0.680 | 44.7            | 1.29  | 24.7 | 0.920          |
| 15                                                       | 12.9  | 53.6            | 3.78  | 38.2 | 0.740          |
| AC Tap Conductivity ( $\mu\text{S}\cdot\text{cm}^{-1}$ ) |       |                 |       |      |                |
| Time (min)                                               | He    | CO <sub>2</sub> | Ar    | Air  | N <sub>2</sub> |
| 0                                                        | 778   | 778             | 778   | 778  | 778            |
| 1                                                        | 700   | 718             | 747   | 698  | 695            |
| 5                                                        | 746   | 722             | 779   | 703  | 696            |
| 10                                                       | 717   | 727             | 778   | 705  | 704            |
| 15                                                       | 727   | 772             | 769   | 712  | 699            |
| DC Tap Conductivity ( $\mu\text{S}\cdot\text{cm}^{-1}$ ) |       |                 |       |      |                |
| Time (min)                                               | He    | CO <sub>2</sub> | Ar    | Air  | N <sub>2</sub> |
| 0                                                        | 778   | 778             | 778   | 778  | 778            |
| 1                                                        | 721   | 730             | 705   | 747  | 760            |
| 5                                                        | 734   | 752             | 712   | 813  | 789            |
| 10                                                       | 781   | 784             | 700   | 892  | 827            |
| 15                                                       | 802   | 830             | 746   | 928  | 898            |

| DC DI Conductivity ( $\mu\text{S}\cdot\text{cm}^{-1}$ )            |      |                 |      |      |                |
|--------------------------------------------------------------------|------|-----------------|------|------|----------------|
| Time (min)                                                         | He   | CO <sub>2</sub> | Ar   | Air  | N <sub>2</sub> |
| 0                                                                  | 0.76 | 0.76            | 0.76 | 0.76 | 0.76           |
| 1                                                                  | 1.20 | 30.4            | 1.05 | 150  | 50.3           |
| 5                                                                  | 1.30 | 13.7            | 2.68 | 367  | 194            |
| 10                                                                 | 15.5 | 27.1            | 27.2 | 493  | 262            |
| 15                                                                 | 76.8 | 25.8            | 28.0 | 673  | 306            |
|                                                                    |      |                 |      |      |                |
| 110 ns Pulsed DI Conductivity ( $\mu\text{S}\cdot\text{cm}^{-1}$ ) |      |                 |      |      |                |
| Time (min)                                                         | He   | CO <sub>2</sub> | Ar   | Air  | N <sub>2</sub> |
| 0                                                                  | 0.76 | 0.76            | 0.76 | 0.76 | 0.76           |
| 1                                                                  | 0.75 | 25.8            | 0.78 | 6.80 | 7.07           |
| 5                                                                  | 55.5 | 46.9            | 12.4 | 39.7 | 10.4           |
| 10                                                                 | 19.5 | 47.6            | 22.0 | 52.4 | 12.8           |
| 15                                                                 | 1.49 | 39.4            | 4.45 | 176  | 95.7           |
|                                                                    |      |                 |      |      |                |
| 220 ns Pulsed DI Conductivity ( $\mu\text{S}\cdot\text{cm}^{-1}$ ) |      |                 |      |      |                |
| Time (min)                                                         | He   | CO <sub>2</sub> | Ar   | Air  | N <sub>2</sub> |
| 0                                                                  | 0.76 | 0.76            | 0.76 | 0.76 | 0.76           |
| 1                                                                  | 0.65 | 27.1            | 37.5 | 2.48 | 6.81           |
| 5                                                                  | 9.70 | 45.9            | 17.0 | 23.6 | 10.7           |
| 10                                                                 | 22.6 | 46.6            | 28.0 | 42.8 | 18.9           |
| 15                                                                 | 1.37 | 38.9            | 1.05 | 141  | 163            |
|                                                                    |      |                 |      |      |                |
| 400 ns Pulsed DI Conductivity ( $\mu\text{S}\cdot\text{cm}^{-1}$ ) |      |                 |      |      |                |
| Time (min)                                                         | He   | CO <sub>2</sub> | Ar   | Air  | N <sub>2</sub> |
| 0                                                                  | 0.76 | 0.76            | 0.76 | 0.76 | 0.76           |
| 1                                                                  | 45.6 | 33.0            | 26.1 | 5.53 | 62.4           |
| 5                                                                  | 8.25 | 46.2            | 19.8 | 26.3 | 20.9           |
| 10                                                                 | 19.1 | 44.5            | 27.2 | 47.1 | 24.6           |
| 15                                                                 | 40.7 | 76.6            | 156  | 237  | 168            |
